# Supplementary material
Source: publisher figshare collection journal article supplement (https://acs.figshare.com/ndownloader/files/16236515)
Supplement: Supplementary file 1 [file 16236515]

# Supporting Information

## Using Polar Alcohols for the Direct Synthesis of Cesium Lead Halide Perovskite Nanorods with Anisotropic Emission

*Yanxiu Li<sup>†</sup>, He Huang<sup>‡#</sup>, Yuan Xiong<sup>†</sup>, Alexander F. Richter<sup>‡#</sup>, Stephen V. Kershaw<sup>†</sup>,  
Jochen Feldmann<sup>‡#</sup>, Andrey L. Rogach<sup>\*†</sup>*

<sup>†</sup> Department of Materials Science and Engineering, and Centre for Functional Photonics (CFP), City University of Hong Kong, 83 Tat Chee Avenue, Kowloon, Hong Kong S.A.R.

<sup>‡</sup> Chair for Photonics and Optoelectronics, Nano-Institute Munich, Physics Department, Ludwig-Maximilians-Universität (LMU), Königinstr. 10, 80539 Munich, Germany

<sup>#</sup> Nanosystems Initiative Munich (NIM) and Center for NanoScience (CeNS), Schellingstr. 4, 80799 Munich, Germany

**Table S1.** Average lengths, widths, full width half maxima, and detailed statistical information of the respective size distributions for the short and long NRs derived from the TEM images shown in the main text as insets to figures 1a and 1b.

| Short NRs           |        |            | Long NRs            |        |            |
|---------------------|--------|------------|---------------------|--------|------------|
| Average length (nm) |        | FWHM (nm)  | Average length (nm) |        | FWHM (nm)  |
| 10.8                |        | 3.5        | 23.2                |        | 7.0        |
| Average width (nm)  |        | FWHM (nm)  | Average width (nm)  |        | FWHM (nm)  |
| 5.3                 |        | 1.8        | 5.4                 |        | 1.6        |
| Length (nm)         | Counts | Percentage | Length (nm)         | Counts | Percentage |
| 7-9                 | 35     | 7%         | 18-20               | 55     | 11%        |
| 9-11                | 240    | 48%        | 20-22               | 110    | 22%        |
| 11-13               | 165    | 33%        | 22-24               | 130    | 26%        |
| 13-15               | 55     | 11%        | 24-26               | 135    | 27%        |
| 15-17               | 5      | 1%         | 26-28               | 35     | 7%         |
|                     |        |            | 28-30               | 35     | 7%         |
| Width (nm)          | Counts | Percentage | Width (nm)          | Counts | Percentage |
| 3-4                 | 13     | 10%        | 3-4                 | 15     | 3%         |
| 4-5                 | 157    | 31%        | 4-5                 | 117    | 23%        |
| 5-6                 | 230    | 46%        | 5-6                 | 269    | 54%        |
| 6-7                 | 80     | 16%        | 6-7                 | 80     | 16%        |
| 7-8                 | 20     | 4%         | 7-8                 | 19     | 4%         |

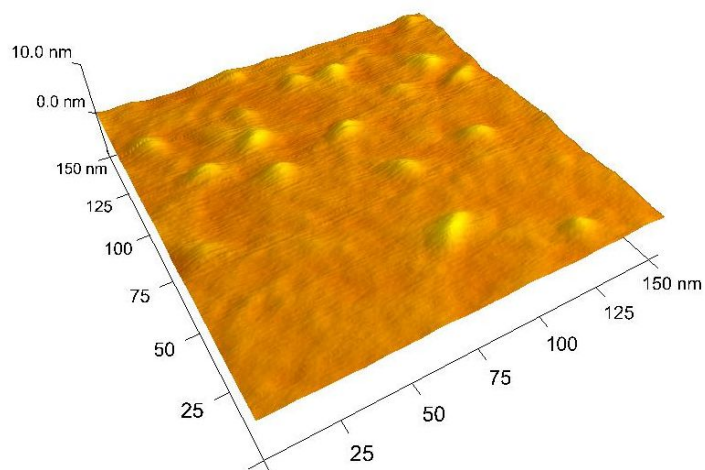

**Figure S1** 3D AFM images of short CsPbBr<sub>3</sub> NRs.

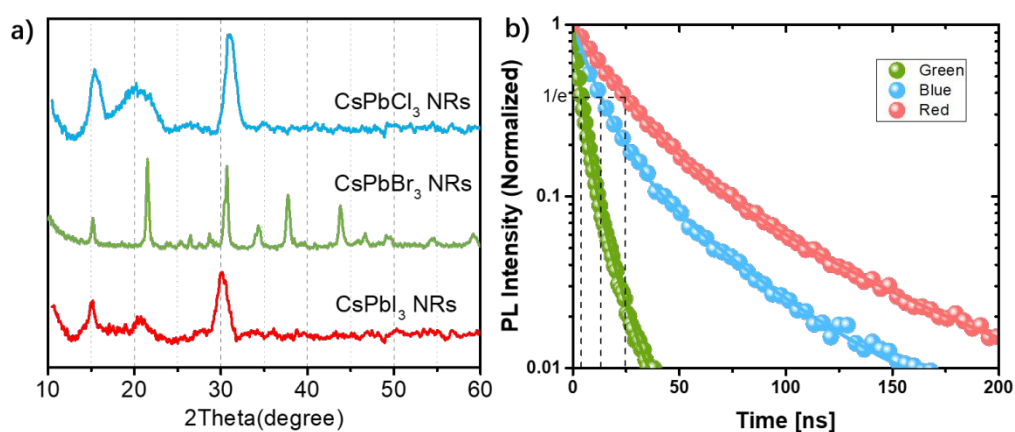

**Figure S2.** (a) XRD patterns of the parent CsPbBr<sub>3</sub> short NRs and CsPbCl<sub>3</sub> and CsPbI<sub>3</sub> NRs obtained through anion exchange reactions. (b) Time resolved PL decays of CsPbBr<sub>3</sub> short NRs, and anion-exchange products CsPbCl<sub>3</sub> and CsPbI<sub>3</sub> NRs, with the solid lines being a mono-exponential fit to the data.

**Table S2.** Comparison of PL QYs, average PL lifetimes ( $\tau_{\text{PL}}$ ), radiative recombination lifetimes ( $\tau_r$ ), and apparent non-radiative recombination lifetimes ( $\tau_{\text{nr}}$ ), exciton Bohr diameters ( $d_{\text{Bohr}}$ ) of CsPbX<sub>3</sub> (X=Cl, Br, or I) NRs with varying halide obtained by ion

exchange.

|                         | QY (%) | $\tau_{\text{PL}}$ (ns) | $\tau_r$ (ns) | $\tau_{\text{nr}}$ (ns) | $d_{\text{Bohr}}$ (nm) | Size (nm)  |
|-------------------------|--------|-------------------------|---------------|-------------------------|------------------------|------------|
| CsPbI <sub>3</sub> NRs  | 48     | 13.3                    | 27.7          | 25.6                    | 12                     | 11.9 x 5.8 |
| CsPbBr <sub>3</sub> NRs | 76     | 4.8                     | 6.3           | 20                      | 7                      | 10.8 x 5.3 |
| CsPbCl <sub>3</sub> NRs | 68     | 24.7                    | 36.3          | 77.2                    | 5                      | 14.9 x 6.2 |

**Table S3.** Comparison of PL QYs, average PL lifetimes ( $\tau_{\text{PL}}$ ), radiative recombination lifetimes ( $\tau_r$ ), and apparent non-radiative recombination lifetimes ( $\tau_{\text{nr}}$ ) of CsPbBr<sub>3</sub> nanocubes and short NRs.

|           | PL QY | $\tau_{\text{PL}}$ (ns) | $\tau_r$ (ns) | $\tau_{\text{nr}}$ (ns) | $k_r(\text{ns}^{-1})$ | $k_{\text{nr}}(\text{ns}^{-1})$ |
|-----------|-------|-------------------------|---------------|-------------------------|-----------------------|---------------------------------|
| Nanocubes | 78 %  | 13.8                    | 17.7          | 62.7                    | 0.056                 | 0.016                           |
| Long NRs  | 60 %  | 6.9                     | 11.5          | 17.3                    | 0.087                 | 0.058                           |
| Short NRs | 76 %  | 4.8                     | 6.3           | 20                      | 0.158                 | 0.05                            |

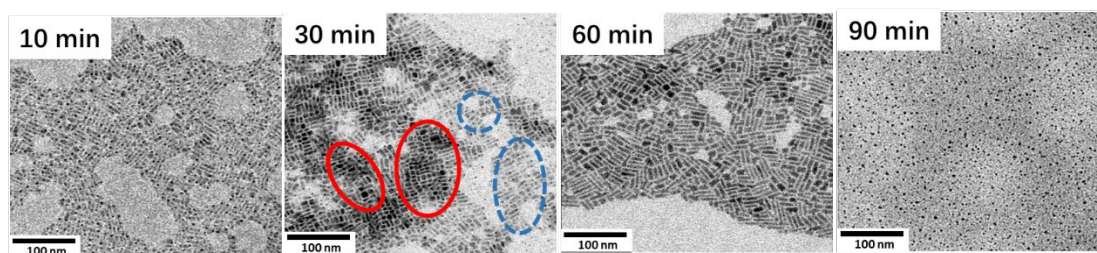

**Figure S3.** TEM images of CsPbBr<sub>3</sub> NRs prepared with different reaction times, as indicated on each frame. At 30 min reaction time, some areas of the initially formed NRs displayed much sharper edges, as marked with red circles, whilst some areas of other NRs still remained fuzzy, as marked with the blue dashed circles. At 60 min the high-quality sample is present. After 90 min the NRs degraded.

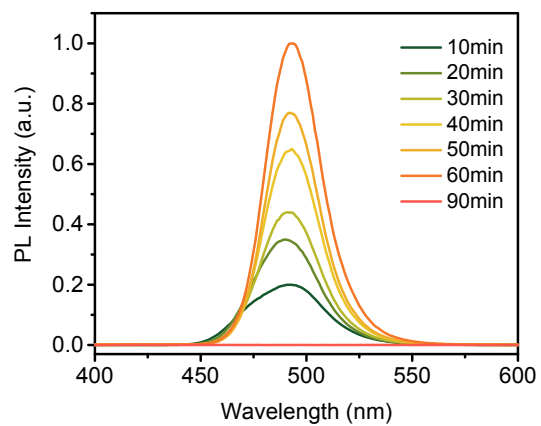

**Figure S4.** PL spectra of CsPbBr<sub>3</sub> NRs prepared with different reaction times, as indicated on the frame.
